# Supplementary material for: Enhancing cognitive memory function with kumquat (Fortunella japonica Swingle) polyphenol extract: mechanisms of action in d-galactose-induced aging model mice
Source: Royal Society of Chemistry journal article supplement (doi:10.1039/d4fo06134a), 2025-01-01
Supplement: d4fo06134a1.pdf [file d4fo06134a1.pdf]

## Supplementary Figures

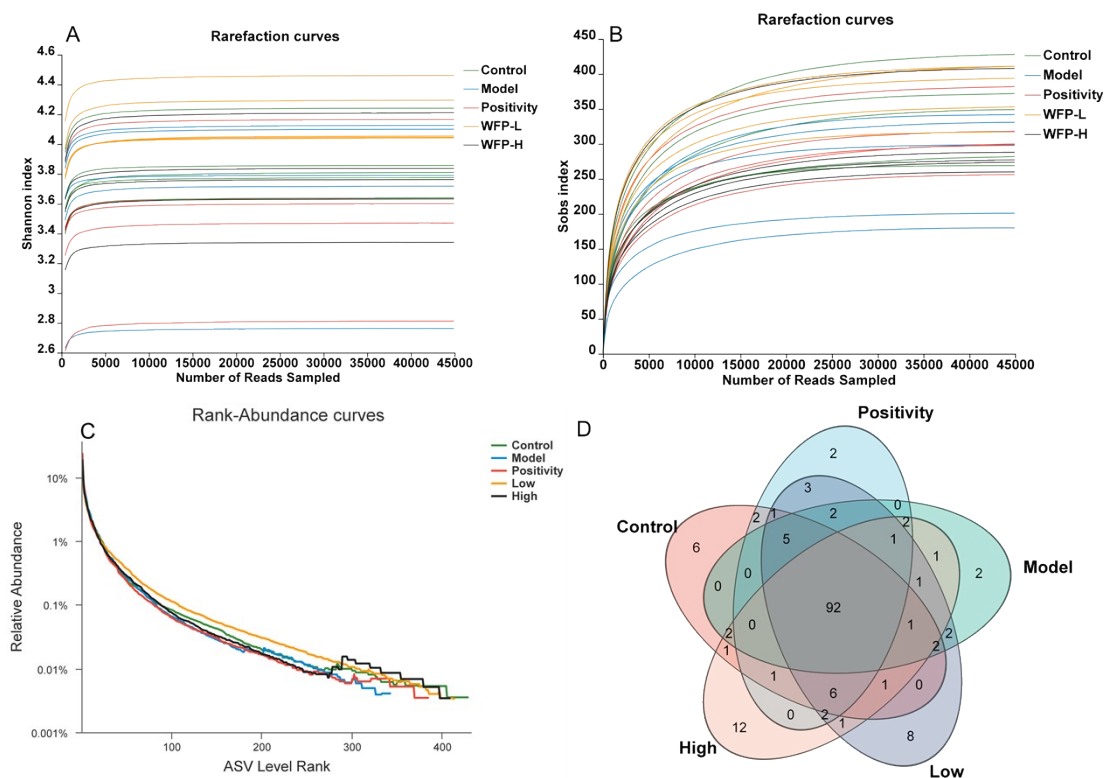

Supplementary Figure1 gut microbial community richness and structure in aging mice. (A) Dilution curves (Shannon index), (B) Sobs index, (C) Alpha diversity abundance rating curve. (D) Venn analysis diagram.

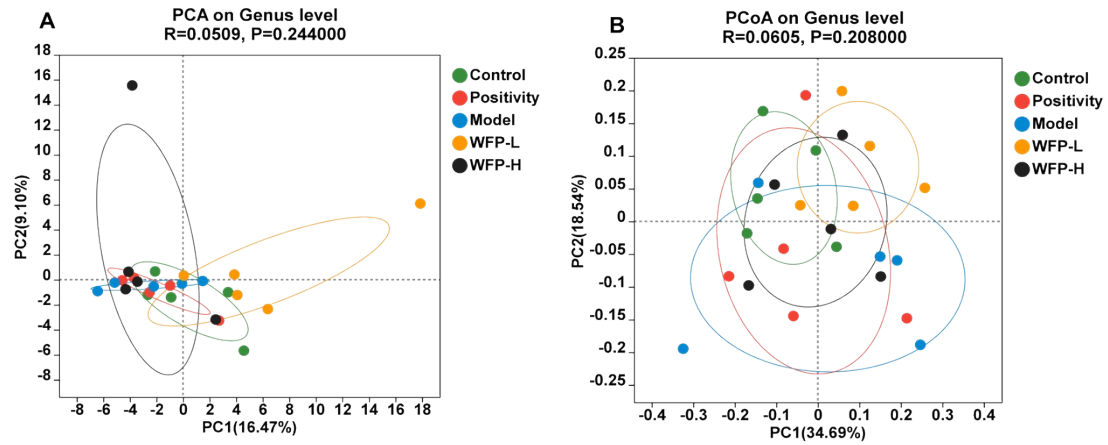

Supplementary Figure 2 The PCA analysis (A) and PCoA analysis (B) of gut microbiota of aging mice

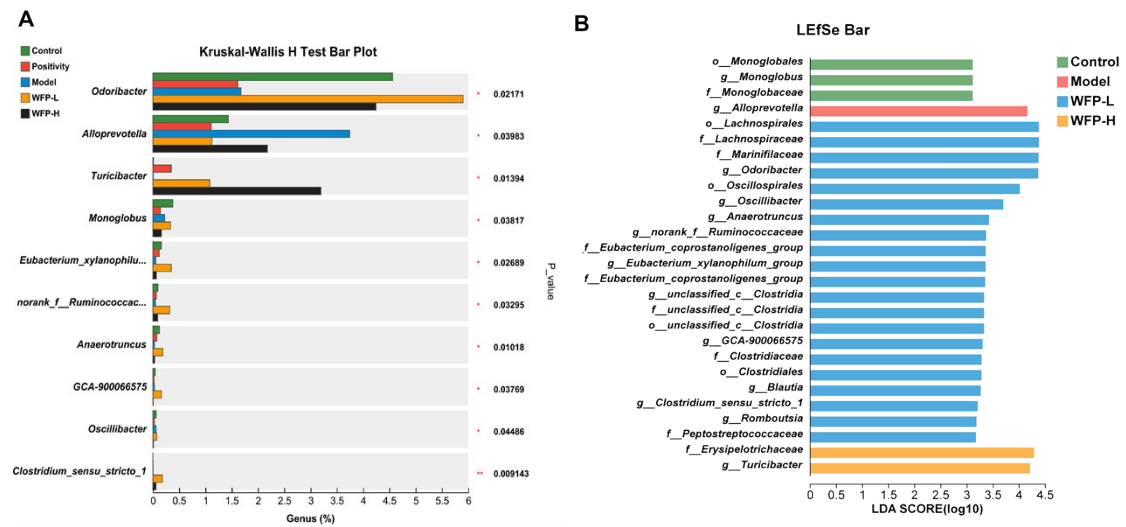

Supplementary Figure 3 The LEfSe analysis result (A) and Linear Discriminant Analysis (LDA) Histogram (B) of gut microbiota in aging mice.
